# 1 **The Accuracy of Cardiac Surface Conduction Velocity** 2 **Measurements**

3 Short title: **Accuracy of Surface Conduction Velocity**

4 Edward J. Vigmond<sup>1</sup>, Caroline Roney<sup>2</sup>, Jason Bayer<sup>1</sup>, Kumaraswamy Nanthakumar<sup>3</sup>

5 **1 IHU Institut LIRYC, Fondation University Bordeaux, Talence, France, and**  
6 **Institute of Mathematics of Bordeaux, UMR 5251, University Bordeaux, Talence,**  
7 **France**

8 **2 School of Engineering and Materials Science, Queen Mary University London,**  
9 **London, UK**

10 **3 The Hull Family Cardiac Fibrillation Management Laboratory, Toronto General**  
11 **Hospital, University Health Network, Toronto, Canada**

12 **Corresponding author: Edward Vigmond**

13 **E-mail: [edward.vigmond@u-bordeaux.fr](mailto:edward.vigmond@u-bordeaux.fr)**

14 **IHU Liryc Hôpital Xavier Arnozan**

15 **Avenue du Haut Lévêque**

16 **33604 Pessac France cedex**

17 Word count: 3271

## 18 Abstract

19 **Background:** Conduction velocity (CV) is a measure of the health of myocardial tissue. It  
20 can be measured by taking differences in activation times from intracardiac electrodes. Several  
21 factors introduce error into the measurement, amongst which, ignoring the three dimensional  
22 aspect is a major detriment. The purpose of this paper was to determine if, nonetheless, there  
23 was a specific region where CV could be accurately measured. **Methods:** Computer simulations  
24 of three dimensional ventricles with a realistic His-Purkinje system were performed. Ventricles  
25 also included a dense scar or diffuse fibrosis. **Results:** A finer spatial sampling produced better  
26 agreement with true CV. Using a error limit of 10 cm/s as a threshold, measurements taken within  
27 a region less than 2 cm from the pacing site proved to be accurate. Error increased abruptly  
28 beyond this distance. The Purkinje system and tissue fibre orientation played equally major roles  
29 in leading to a surface CV which was not reflective of the CV propagation through the tissue.  
30 **Conclusions:** Surface CV measurements close to the pacing site taken with an electrode spacing  
31 of at most 1 mm, give reasonable estimates of tissue CV.

### 32 Keywords

33 conduction velocity, computer simulation, conduction system, fibrosis, scar

## 34 1 Introduction

35 Conduction velocity (CV) is an important measure to assess the health of cardiac tissue. It  
36 is sensitive to both structural changes, as well as ionic modifications. Structural changes, such  
37 as fibrosis, can lead to a more tortuous propagation which, in the absence of gap junctional  
38 remodelling, results in a slower macroscopic CV. Disruptions to gap junctions also leads to direct  
39 CV changes on the microscopic scale. Perturbations to sodium channels also directly influence  
40 CV, and ionic channels which modify the resting level also have an effect by modulating the level  
41 of inactivation of sodium channels. Thus, while CV changes are nonspecific, further elucidation  
42 is possible by considering the rate of change of voltage during the upstroke, and the degree of  
43 electrogram fractionation [1, 2].

44 Cardiac tissue is three dimensional which necessitates three dimensional recordings for accurate  
45 measurement. However, clinically measurements are restricted to the surface, whether it be by  
46 electroanatomic mapping systems or ECGi. Clinical systems are being developed which measure  
47 local, surface CV. These systems are evolving to be multipolar with small interelectrode spacing,  
48 allowing more accurate determination of activation from any direction. We have previously shown  
49 the inaccuracy of surface measurements when trying to localize intramural ectopic foci, as well as  
50 the error in computing CV [3,4]. Thus, the interpretation of these measurements should be treated  
51 cautiously, as their validity or utility need further clarification.

52 In this paper, we consider whether there are conditions under which recorded CV may be  
53 considered free from artifact and reflects the true CV, allowing it to be a diagnostic measure. We  
54 perform computer simulations — the only method being able to easily provide high density 3D CV  
55 — in a human geometry with a conduction system. Pacing is performed from different sites under  
56 different conditions, and the endocardially measured CVs, at different resolutions, are compared  
57 to the true CV.

## 58 2 Methods

### 59 2.1 Geometry

60 A three dimensional, human, finite element mesh was used with 450 micrometer discretization,  
61 yielding 5 million nodes and 26.4 million tetrahedral elements. A Purkinje system (PS) was  
62 added based on known anatomical detail, having a His bundle which divided into three fascicles  
63 in the LV, and a single fascicle to the RV bifurcating to form the moderator band and an apical  
64 extension [5]. See Fig. 1. There were 522 Purkinje-myocyte junctions through which electrical  
65 activity propagated between the myocardium and the Purkinje network.

66 A dense scar was synthetically added to the anterior LV wall (Fig. 1 middle) by defining it in  
67 universal ventricular coordinates:  $0.3 < z < 0.7$ ,  $\pi/4 < \phi < 3\pi/4$ ,  $0.1 < \rho < 0.9$ ,  $\nu = -1$  [6].  
68 The scar was not fully transmural, allowing surviving epicardial and endocardial layers. Within  
69 the dense scar, all tissue was considered dead and therefore not included in electrophysiological

70 calculations. A region of diffuse fibrosis was also defined (Fig. 1 right) by universal ventricular  
71 coordinates and added to the RV free wall:  $0.3 < z < 0.7$ ,  $-3\pi/8 < \phi < 0$ ,  $\rho \leq 1$ ,  $\nu = 1$ . Within  
72 this region, CV was reduced by a factor of four in all directions. The PS was assumed to be  
73 unaffected by fibrosis and scar [7, 8].

## 74 2.2 Electrophysiology

75 The ten Tusscher ionic model for human ventricular cells was used for the working myocardium,  
76 and the Steward canine Purkinje ionic model was used for the PS. All simulations were performed  
77 with the carpentry electrophysiological simulator [9] using a time step of  $25 \mu\text{s}$ . Conductivities  
78 in the model were set to produce conduction velocities in the myocardium of 71.4, 21.7, and 12.9  
79 cm/s in the longitudinal, transverse and sheet normal directions in accordance with values and  
80 ratios seen physiologically [10, 11]. Sinus activation of the heart as measured from simulated lead  
81 potentials took 134 ms.

82 A total of 18 endocardial pacing sites were used, evenly divided between the ventricle, spread  
83 along the major axis, i.e.,  $z$ , with universal ordinates of 0, 0.5, and 0.7. See Fig. 1. A 2 ms  
84 long transmembrane current of  $70 \mu\text{A}/\text{cm}^2$  was applied to a  $1 \text{ mm}^3$  volume at each pacing point,  
85 affecting only myocardium.

## 86 2.3 Conduction Velocity

87 Activation time was based on transmembrane voltage, taken as the instant when the transmem-  
88 brane voltage exceeded  $-50 \text{ mV}$  with a  $dV/dt > 5 \text{ V/s}$  calculated with a resolution of  $100 \mu\text{s}$ . CV  
89 was calculated as the magnitude of the inverse of the gradient of activation times over each finite  
90 element. To arrive at different sampling resolutions, the endocardial meshes were extracted from  
91 the original fine mesh, and then resampled at edge lengths of 0.5, 1, 1.5, 2, 3, and 4 mm. Activation  
92 times were transferred to the coarser mesh by inverse distance weighting radial basis functions,  
93 and CV computed from these times on the coarser surface-only mesh. CVs were subsequently  
94 smoothed using Gaussian radial basis function weighting with a 4 mm radius. The gold standard  
95 was the CV measurements made on the fine mesh taking into account the 3D propagation. Errors

96 reported are the difference between CVs derived from surface calculation versus those obtained  
97 from the full 3D propagation. Distances from pacing sites refers to the distances traveled through  
98 the myocardium to reach a recording site from the pacing point, determined by using an Eikonal  
99 solution with unit isotropic conduction velocity.

## 100 **3 Results**

### 101 **3.1 Nominal case**

102 The magnitude of the CV error is shown as a function of distance from the pacing site for all  
103 stimuli in Fig. 2. All curves have the same general shape. Very close to the pacing site, the error  
104 decreases from an initial value. After several millimeters, the error increases slowly. At some  
105 distance from each pacing site, when the ensuing wavefront started to cross the septum or reached  
106 an edge, the error rose rapidly to a high level and then returned just as rapidly to a stable level,  
107 as the activation once again propagated through the free wall. The large error was associated  
108 with breakthroughs when the wavefront simultaneously activated large regions of the contralateral  
109 septal wall.

110 The case of pacing site #12, a mid-height anterior site, is shown in detail in Fig. 3. The error  
111 distribution is typical for all pacing sites. A low error region surrounds the pacing site with a  
112 larger error band running through it, which coincides with the endocardial fibre direction. The  
113 error transition is rather abrupt after 1–2 cm, depending on the direction travelled. The large  
114 error can be seen on the RV septum in the posterior view (Fig. 3upper left). CV is consistently  
115 overestimated, and is only underestimated at the basal border where propagation hit a barrier.

116 The density of Purkinje-myocardial junctions (PMJs) is shown in the right panel of Fig. 3.  
117 There appears to be a correlation between junction density and error. Regions of high junctional  
118 density with large error are found (anterior mid LV, or high anterior LV), as are low junctional  
119 density regions with low error (basal regions, and lower posterior RV free wall). However, regions  
120 do not perfectly overlap as there are high junctional density regions with low error (anterior RV  
121 near septum), and low junctional density regions with high error (anterior RV base).

## 122 **3.2 Effect of resolution**

123 The error averaged over all pacing sites for each resolution is shown in Fig. 4. All resolutions showed  
124 a similar shape. Close to the pacing electrode, the error is low and reaches a minimum at a few  
125 millimeters away, followed by a steep rise with an abrupt peak, beyond which the error gradually  
126 changes. Beyond 10 cm (not shown), errors become quite large as errors are measured in the  
127 non-stimulated ventricle, and there are septal breakthroughs and wavefront collisions. The error  
128 was similar for the highest two resolutions, 0.5 and 1 mm edge lengths. For the other resolutions,  
129 the error was unacceptable.

## 130 **3.3 Recording location**

131 The CV error was analyzed for the endocardial regions divided into the free wall and septum for  
132 each ventricle. The magnitude of the CV error in each region was averaged over the region for all  
133 pacing sites in a particular ventricle. Results are summarized in Table 1.

134 In all cases, contralateral measurements had higher errors than same cavity measurements. The  
135 LV free wall had the largest error regardless of ventricle activated. The RV free wall had the lowest  
136 overall error, while the RV septum was fairly accurate for RV pacing sites but very inaccurate for  
137 LV pacing.

## 138 **3.4 Effect of Fibrosis**

139 The effects of including a dense intramural scar, or diffuse fibrosis, are shown for a 1 mm resolution  
140 in Fig. 5. The error was different in very close proximity to the pacing, being far less for the healthy  
141 case and diffuse scar, but there was little difference farther than 1 cm. The scar region was not  
142 identifiable by CV changes over the scar, regardless of pacing site.

143 The CV measured and the error are shown for pacing site #4, a lower anterior site in the RV,  
144 in Fig; 6. The region of diffuse scar is clearly seen in the CV map as a region of reduced CV.  
145 Very high CVs are seen on septal breakthroughs in the nonstimulated ventricle (bright yellow on  
146 the left). The CV error within 2 cm of the pacing site was very low, and the CV error over the  
147 fibrosis was relatively low, mostly less than 50 mm/s, but some high errors are also seen. Low CV

148 was consistently seen over the diffuse fibrosis, regardless of pacing site, even contralateral. The  
149 activation pattern shows dense spacing of isochrones over the fibrosis with many breakthroughs  
150 (Fig; 6 left). These are more apparent in the fibrosis region since the PS was assumed to be  
151 unaffected and the lower CV of the myocardium did not allow enough time for wavefronts travelling  
152 through the tissue reach PMJs before activity emerged. The CV error in the LV was much higher  
153 and much less reliable.

### 154 **3.5 Purkinje activation**

155 The effect of the Purkinje system was ascertained by performing simulations with no Purkinje  
156 system (Fig. 5). As noted previously, there was little difference in error for the three cases with  
157 a Purkinje system present. For healthy tissue and dense scar, removing the Purkinje system  
158 decreased the error substantially, by approximately 50 mm/s, for distances between 1 and 7 cm.  
159 Diffuse fibrosis was little affected in this range. Close to the pacing site, diffuse fibrosis and healthy  
160 tissue errors were increased while dense scar CV error was decreased.

### 161 **3.6 Factors Affecting Accuracy**

162 The sensitivity of the CV to the relative speed of propagation was performed. The conductivities  
163 were doubled to achieve approximate increases of 1.41 fold. Sinus activation was affected as  
164 expected (see Fig. 7). Increasing the Purkinje CV decreased the total activation time and led to  
165 more pronounced breakthroughs and transmural propagation was allowed less time to propagate  
166 from neighboring previously activated junctions. Increasing the myocardial propagation speed did  
167 not decrease total activation time very much as apex to base conduction is primarily dictated by  
168 the Purkinje system except for the most basal portion. Increasing myocardial conduction velocity  
169 provides more interaction between basally oriented wavefronts and junctional activations that  
170 masked the breakthroughs.

171 Furthermore, the effect of fibre structure and the Purkinje system were also compared. Re-  
172 moving the Purkinje system had the same effect on accuracy as ignoring the fibre structure. When  
173 ignoring the Purkinje system as well as the fibre structure, the error was greatly reduced even at

174 farther distances from the pacing site.

175 The effect of the relative changes in conduction velocity on the CV error is shown in Fig. 7  
176 bottom. With a fast Purkinje system, the error in close proximity ( $< 1.5$  cm) was modestly  
177 decreased, while it was unchanged farther away. Increasing the myocardial CV increased the  
178 magnitude of the CV error, approximately by the same factor as the increase in CV.

## 179 4 Discussion

180 This study performed a set of simulations to ascertain the accuracy of using surface-only activation  
181 measurements to determine the CV, and assess tissue health. Several recording resolutions were  
182 examined, as well as the effects of the Purkinje system, tissue structure, and relative CV. The  
183 major findings are that 1) CV can be measured accurately within 2 cm of the pacing site, 2)  
184 spatial sampling of at most 1 mm is necessary, and 3) tissue structure and the Purkinje system  
185 were equally responsible for CV measurements far from the pacing site.

### 186 4.1 Accuracy

187 The CV measured near the site of pacing was the most accurate. Accepting a maximum error  
188 of 10 cm/s, about 10% of the longitudinal CV, CV measured within 2 cm of the pacing site was  
189 acceptable and the CV increased rapidly beyond that. CV measured in the nonstimulated ventricle  
190 was not reliable.

191 There are several reasons for the discrepancy between true CV and surface measured CV.  
192 The inaccuracy of capturing behaviour which is fundamentally 3D from surface recordings has  
193 been shown [3,4]. This is especially apparent on the septal region of the unactivated ventricular  
194 endocardium, where large breakthrough occur as activity propagates across the septum.

195 The orientation of the myocytes has a large effect on the surface propagation, roughly equal to  
196 that of the PS. Removing both of these aspects results in a propagation that is orthogonal to the  
197 surface and is accurately measured by surface-only measurements, with error decreased by an order  
198 of magnitude. This study highlights how interpreting surface activation patterns over large regions



199 as simple planar wave propagation in isotropic tissue leads to misleading conclusions. Propagation  
200 is complicated and has to be understood in the context of complex structure architecture with fast  
201 auxiliary pathways.

## 202 **4.2 Purkinje System**

203 The Purkinje system is also a factor leading to surface CV error. The electrical activity propagates  
204 into the PS and then exits farther away from the pacing site. The PS activity can breakthrough  
205 ahead of the myocardial wavefront, or merge with it, and effectively speed up the apparent prop-  
206 agation. This situation between PS and myocardial interplay is further complicated by delays  
207 entering and exiting the PS, with anterograde delays being longer. Near the pacing site, these  
208 delays are longer than the time to propagate through the tissue, so the surface propagation is most  
209 similar to the myocardial propagation. The activity has also not traversed the septum or collided  
210 with any obstacles at this point. Without a PS, the error was much lower (Fig. 5), as would be  
211 expected. Also, the initial decrease in CV error followed by a rapid increase in the error was no  
212 longer seen without the PS.

## 213 **4.3 Fibrosis**

214 Two different types of fibrosis were examined, dense and diffuse. The PS was kept as fully func-  
215 tioning as suggested by several studies [7, 8]. The diffuse fibrotic region was fully transmural but  
216 still allowed conduction, albeit greatly slowed in all directions. Regardless of where the ventricles  
217 were paced, the diffuse fibrosis area was identifiable as a zone of slow conduction with relatively  
218 small CV error. Hence, CV mapping can be used clinically to identify areas of diffuse fibrosis,  
219 despite the fact that CV values may not be reliable. Thus, unlike high CVs which are usually  
220 spurious, lower CVs are more likely correct. However, although the speed of propagation was slow  
221 over the diffuse scar, directionality was not consistent as multiple breakthroughs were present.

222 Importantly, the dense region of intramural fibrosis was not discernible from CV measurements  
223 as there existed a healthy, surviving endocardial layer that masked the infarct. The amplitude of  
224 the extracellular potential signals was not considered, but could be taken into account to define

225 this region [12].

## 226 **4.4 Uncertainty in clinical measurements**

227 There are multiple sources of uncertainty in electroanatomic mapping recordings including in the  
228 construction of the ventricular anatomy, the movement of the catheter, and the assignment of  
229 activation time, particularly in the case of fractionated electrograms. This means that errors in  
230 CV measurements due to catheter movement, for example, may be bigger than the errors because  
231 of the surface nature of the measurement. Coveney et al developed methodologies for quantifying  
232 these uncertainties in CV measurements that could be extended to volumetric measurements [13].  
233 In addition, the methodology used to estimate CV could have an impact on the difference between  
234 surface and volumetric estimates. Methodologies that utilise more measurements over a larger  
235 area for estimation will be less sensitive to the effects of PS break-through, but may not capture  
236 local heterogeneity [14].

## 237 **4.5 Implications for arrhythmia mapping**

238 Identifying the location and conduction properties of reentrant ventricular tachycardia (VT) cir-  
239 cuits is important for targeting catheter ablation therapy [15]. Our study indicates the importance  
240 of the three-dimensional nature of the ventricular tissue and its conduction, which should be con-  
241 sidered when mapping VT circuits. Future work will simulate different circuits and compare their  
242 surface and volumetric CV estimates and propagation vector field analysis.

243 The travelling isotropic planar wave is the simplest propagation pattern to conceive and analyze.  
244 If this were the case, the apparent CV would be accurate everywhere, as shown in Fig. 6. Recently,  
245 a hyperboloid form has been suggested as an excitation pattern for monomorphic ventricular  
246 circuits [16]. However, even this more sophisticated activation pattern interprets surface isochrones  
247 assuming isotropic propagation with no Purkinje contribution. This surface pattern could, thus,  
248 not be truly indicative of the underlying true activation. In contrast to reentry involving a single  
249 cylindrical isthmus, histological studies report a more complicated structure with multiple, tortuous  
250 routes [17].

251 A better method for estimating true CV would be to pace and map from the same catheter,  
252 moving the catheter over the endocardial surface and stitching together the resultant CVs. The  
253 catheter should ideally be high density and have an area of several cm<sup>2</sup>. Measuring CV in the  
254 same ventricle as the one paced, as our study suggests, has been previously promoted to identify  
255 poorly coupled myocardium [16].

## 256 4.6 Conclusions

257 Conduction velocity can be accurately measured by surface electrodes if the distance between  
258 recording electrodes is at most 1 mm, and if the recordings are made in the range of 0.5–2 cm  
259 from the stimulating site. Diffuse transmural fibrosis is detectable, irrespective of distance from  
260 the pacing site.

## 261 4.7 Limitations

262 Sinus activation of the ventricles, approximating the QRS width was longer than normal, being  
263 135 ms instead of a more normal value of 120 ms. This had little bearing on the results as shown  
264 in §3.6.

## 265 5 Sources of Funding

266 EJV and JB were supported by the French Government as part of the “Investments of the  
267 Future” program managed by the National Research Agency (ANR), Grant reference ANR-10-  
268 IAHU-04. JB was also supported by the European Union’s Horizon 2020 research and innovation  
269 program under the ERA-NET co-fund action No. 680969 with ANR [ERA-CVD SICVALVES  
270 grant ANR-19-ECVD-0006]. CR acknowledges support from a UKRI Future Leaders Fellowship  
271 (MR/W004720/1). This work was performed using HPC resources from GENCI–IDRIS (Grant  
272 A0140310517).

## 273 6 References

274

- 275 1. Boyle PM, Franceschi WH, Constantin M, Hawks C, Desplantez T, Trayanova NA, Vigmond  
276 EJ. New Insights on the Cardiac Safety Factor: Unraveling the Relationship Between  
277 Conduction Velocity and Robustness of Propagation. *Journal of Molecular and Cellular*  
278 *Cardiology*, 2019;128:117–128.
- 279 2. Takahashi Y, Yamaguchi T, Otsubo T, Nakashima K, Shinzato K, Osako R, Shichida S,  
280 Kawano Y, Fukui A, Kawaguchi A, et al. Histological Validation of Atrial Structural Re-  
281 modelling in Patients with Atrial Fibrillation. *European Heart Journal*, 2023;ehad396.
- 282 3. Padilla JR, Anderson RD, Joens C, Masse S, Bhaskaran A, Niri A, Lai P, Azam MA, Lee G,  
283 Vigmond E, Nanthakumar K. Orientation of Conduction Velocity Vectors on Cardiac Map-  
284 ping Surfaces. *Europace : European Pacing, Arrhythmias, and Cardiac Electrophysiology*  
285 *: Journal of the Working Groups on Cardiac Pacing, Arrhythmias, and Cardiac Cellular*  
286 *Electrophysiology of the European Society of Cardiology*, 2023;25:1172–1182.
- 287 4. Anderson RD, Rodriguez Padilla J, Joens C, Masse S, Bhaskaran A, Magtibay K, Niri A,  
288 Asta J, Lai P, Azam MA, Vigmond E, Nanthakumar K. On the Electrophysiology and  
289 Mapping of Intramural Arrhythmic Focus. *Circulation. Arrhythmia and Electrophysiology*,  
290 2022;15:e010384.
- 291 5. Bayer JD, Sobota V, Moreno A, Jaïs P, Vigmond EJ. The Purkinje Network Plays a Major  
292 Role in Low-Energy Ventricular Defibrillation. *Computers in Biology and Medicine*, 2022;  
293 141:105133.
- 294 6. Bayer J, Prassl AJ, Pashaei A, Gomez JF, Frontera A, Neic A, Plank G, Vigmond EJ.  
295 Universal Ventricular Coordinates: A Generic Framework for Describing Position within  
296 the Heart and Transferring Data. *Medical Image Analysis*, 2018;45:83–93.

- 297 7. Friedman PL, Fenoglio JJ, Wit AL. Time Course for Reversal of Electrophysiological and  
298 Ultrastructural Abnormalities in Subendocardial Purkinje Fibers Surviving Extensive My-  
299 ocardial Infarction in Dogs. *Circulation Research*, 1975;36:127–144.
- 300 8. Friedman PL, Stewart JR, Fenoglio JJ, Wit AL. Survival of Subendocardial Purkinje Fibers  
301 After Extensive Myocardial Infarction in Dogs. *Circulation Research*, 1973;33:597–611.
- 302 9. Vigmond EJ, Hughes M, Plank G, Leon LJ. Computational Tools for Modeling Electrical  
303 Activity in Cardiac Tissue. *Journal of Electrocardiology*, 2003;36 Suppl:69–74.
- 304 10. Roth BJ. Electrical Conductivity Values Used with the Bidomain Model of Cardiac Tissue.  
305 *IEEE Transactions on Bio-Medical Engineering*, 1997;44:326–328.
- 306 11. Glukhov AV, Fedorov VV, Kalish PW, Ravikumar VK, Lou Q, Janks D, Schuessler RB,  
307 Moazami N, Efimov IR. Conduction Remodeling in Human End-Stage Nonischemic Left  
308 Ventricular Cardiomyopathy. *Circulation*, 2012;125:1835–1847.
- 309 12. Soejima K, Stevenson WG, Maisel WH, Sapp JL, Epstein LM. Electrically Unexcitable  
310 Scar Mapping Based on Pacing Threshold for Identification of the Reentry Circuit Isthmus:  
311 Feasibility for Guiding Ventricular Tachycardia Ablation. *Circulation*, 2002;106:1678–1683.
- 312 13. Coveney S, Corrado C, Roney CH, O’Hare D, Williams SE, O’Neill MD, Niederer SA, Clay-  
313 ton RH, Oakley JE, Wilkinson RD. Gaussian Process Manifold Interpolation for Probabilis-  
314 tic Atrial Activation Maps and Uncertain Conduction Velocity. *Philosophical Transactions*  
315 *of the Royal Society A*, 2020;378:20190345.
- 316 14. Coveney S, Cantwell C, Roney C. Atrial Conduction Velocity Mapping: Clinical Tools,  
317 Algorithms and Approaches for Understanding the Arrhythmogenic Substrate. *Medical &*  
318 *Biological Engineering & Computing*, 2022;60:2463–2478.
- 319 15. Ciaccio EJ, Anter E, Coromilas J, Wan EY, Yarmohammadi H, Wit AL, Peters NS, Garan  
320 H. Structure and Function of the Ventricular Tachycardia Isthmus. *Heart Rhythm*, 2022;  
321 19:137–153.

- 322 16. Nishimura T, Shatz N, Weiss JP, Zawaneh M, Bai R, Beaser AD, Upadhyay GA, Aziz  
323 ZA, Nayak HM, Shatz DY, Miyazaki S, Goya M, Sasano T, Su W, Raiman M, Tung R.  
324 Identification of Human Ventricular Tachycardia Demarcated By Fixed Lines of Conduction  
325 Block in a 3-Dimensional Hyperboloid Circuit. *Circulation*, 2023;148:1354–1367.
- 326 17. Ghashan CA, Androulakis AFA, Tao Q, Ghashan RN, Wisse LJ, Ebert M, de Ruitter MC,  
327 van Meer BJ, Brouwer C, Dekkers OM, Pijnappels DA, de Bakker JMT, de Riva M, Piers  
328 SRD, Zeppenfeld K. Whole Human Heart Histology to Validate Electroanatomical Voltage  
329 Mapping in Patients with Non-Ischaemic Cardiomyopathy and Ventricular Tachycardia.  
330 *European Heart Journal*, 2018;39:2867–2875.

**Table 1.** Average CV error magnitude (mm/s) and its standard deviation (mm/s) for each region as a function of the ventricle paced. Errors are averaged over all pacing sites in each ventricle for healthy ventricles. The grid resolution was 1 mm.

| Region       | RV stim |            | LV stim |            |
|--------------|---------|------------|---------|------------|
|              | Mean    | $\sigma^2$ | Mean    | $\sigma^2$ |
| LV septum    | 151     | 662        | 93.6    | 592        |
| LV free wall | 170     | 655        | 152     | 623        |
| RV septum    | 47.1    | 675        | 176     | 1131       |
| RV free wall | 70.6    | 443        | 77.5    | 463        |

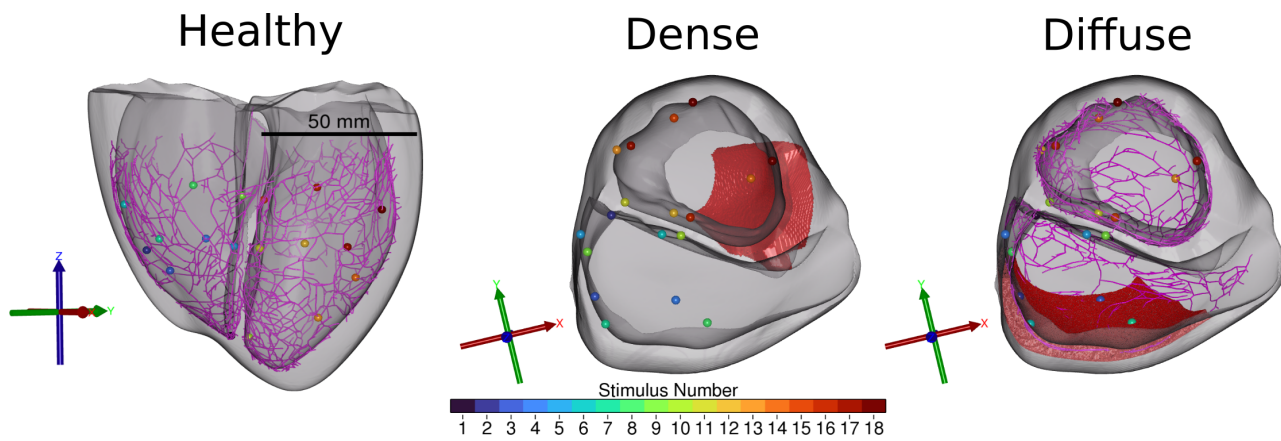

**Figure 1.** Experimental set up. Stimulation points are shown on the different views of the ventricles. Left: The Healthy heart had no fibrosis. The Purkinje system is depicted by the purple lines, and a scale bar is shown. Middle: the dense scar region is in red, and the Purkinje system is not shown. Right: The diffuse fibrosis is shown with the Purkinje system. Axes give the orientations of the hearts. The first 9 sites are in the RV and the rest in the left. Within each ventricle, numbering increases with distance from the base.



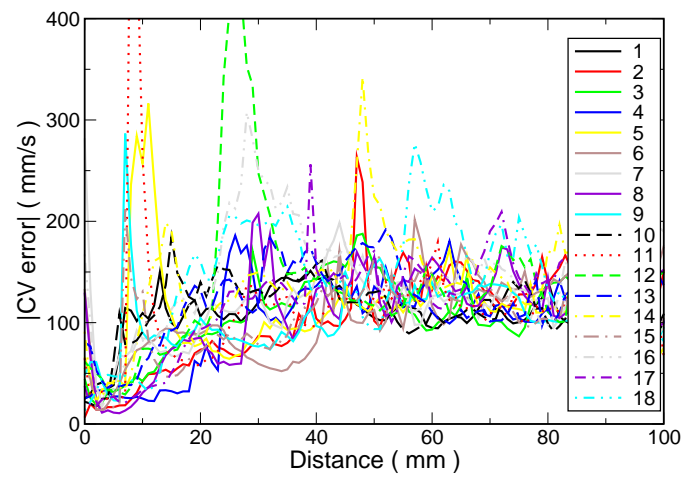

**Figure 2.** Magnitude of CV error as a function of distance from each pacing site. RV sites have solid curves while LV related curves are dashed. The grid resolution was 0.5 mm.

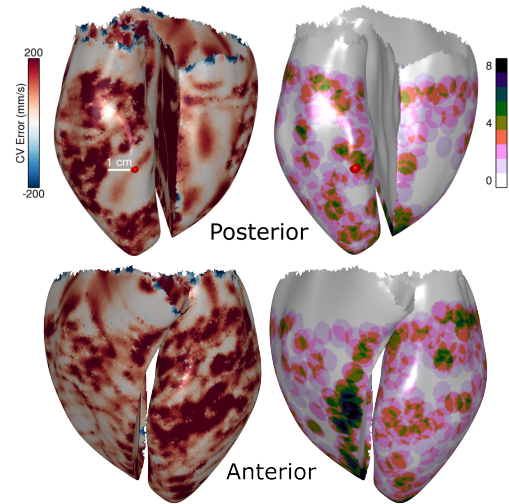

**Figure 3.** CV error and PMJ density. The pacing site #12 is indicated by the red dot. **Left:** The magnitude of the conduction velocity (CV) error on the endocardial surfaces at a resolution of 1 mm. A white scale bar indicates a distance of 1 cm. **Right:** The number of PMJs within a radius of 3 mm from each surface point is mapped.

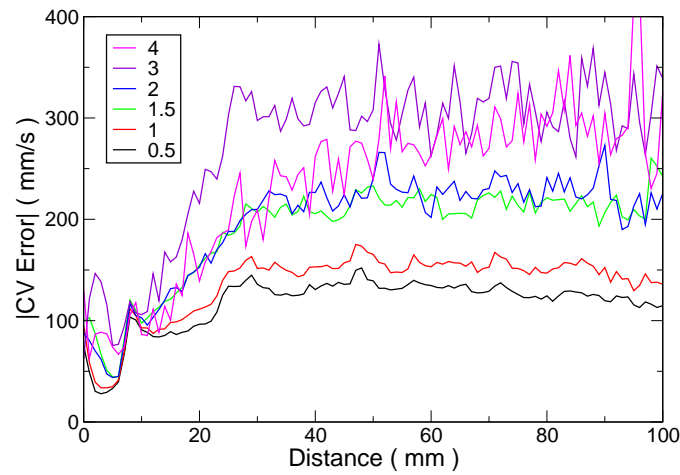

**Figure 4.** CV error versus distance from pacing site depends on mesh resolution. The average magnitude of the error in conduction velocity is plotted as a function of surface distance from all pacing sites for various mesh resolutions. Resolutions are indicated as average element edge length in mm.

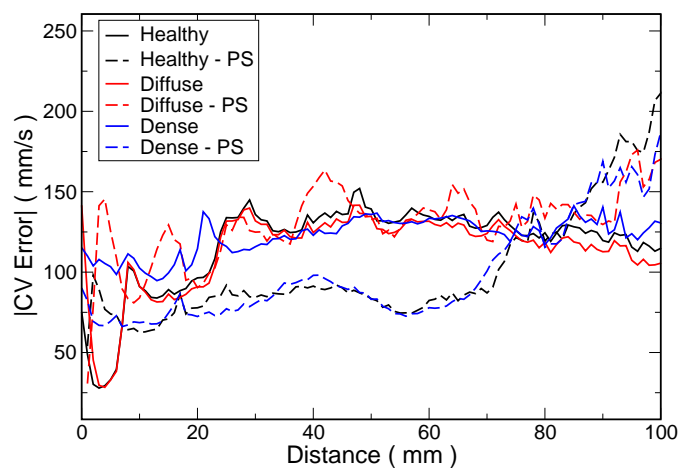

**Figure 5.** Effect of the fibrosis and Purkinje system on CV error. The magnitude of the error in conduction velocity is plotted as a function of surface distance from pacing site averaged over all pacing sites for 1 mm resolution. The error is shown for healthy ventricles (black), with diffuse fibrosis (red) and dense fibrosis (blue) with and without a Purkinje system (-PS). The resolution used was 1 mm.

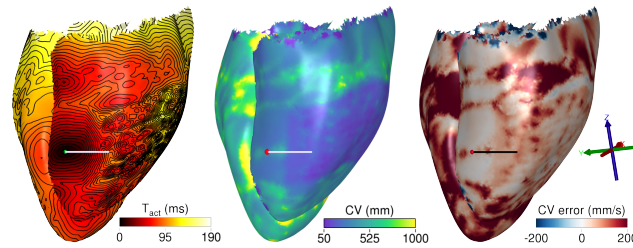

**Figure 6.** CV and CV error for pacing site #4 near diffuse fibrosis. Right lateral view indicating the RV pacing site by a red dot. **Left:** Activation map with 5 ms isochrones. **Middle:** Conduction velocity (CV) calculated on the endocardial surfaces of the heart. The white scale bar indicates a distance of 2 cm. **Right:** The CV error on the endocardial surfaces is shown with a black scale bar of length 2 cm. The map was computed with 1 mm spacing.

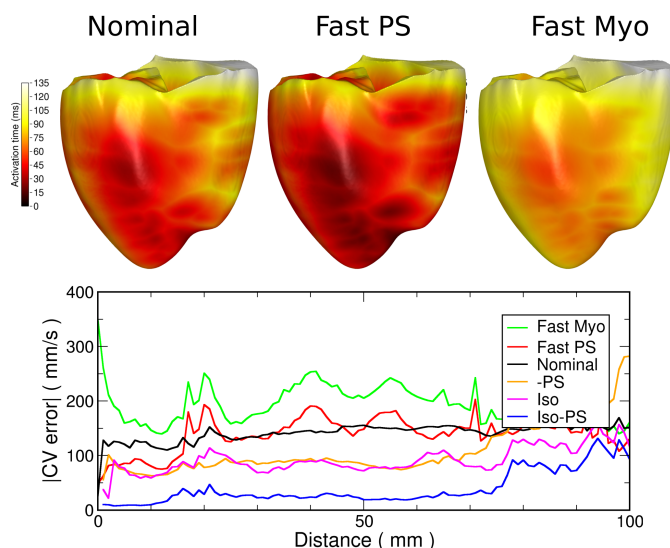

**Figure 7.** Effect of relative conduction velocities. **Top:** Activation times for the nominal case, Purkinje system CV increased by 1.41 fold (Fast PS), and myocardial CV increased by 1.41 fold (Fast Myo). **Bottom:** Magnitude of conduction velocity error as a function of distance from the pacing site when increasing propagation CV in the myocardium 1.41-fold (Fast Myo), increasing CV in the Purkinje System by 1.41-fold (Fast PS), removing the PS (-PS), ignoring fibre structure (Iso), and ignoring both the PS and the fibre structure (Iso-PS).
